# Supplementary material
Source: publisher figshare collection journal article supplement (https://acs.figshare.com/ndownloader/files/5136943)

## Supplemental Information

The spectra shown below demonstrate that the dendrimer absorption spectrum is blue shifted from that of the PPP polyelectrolyte.

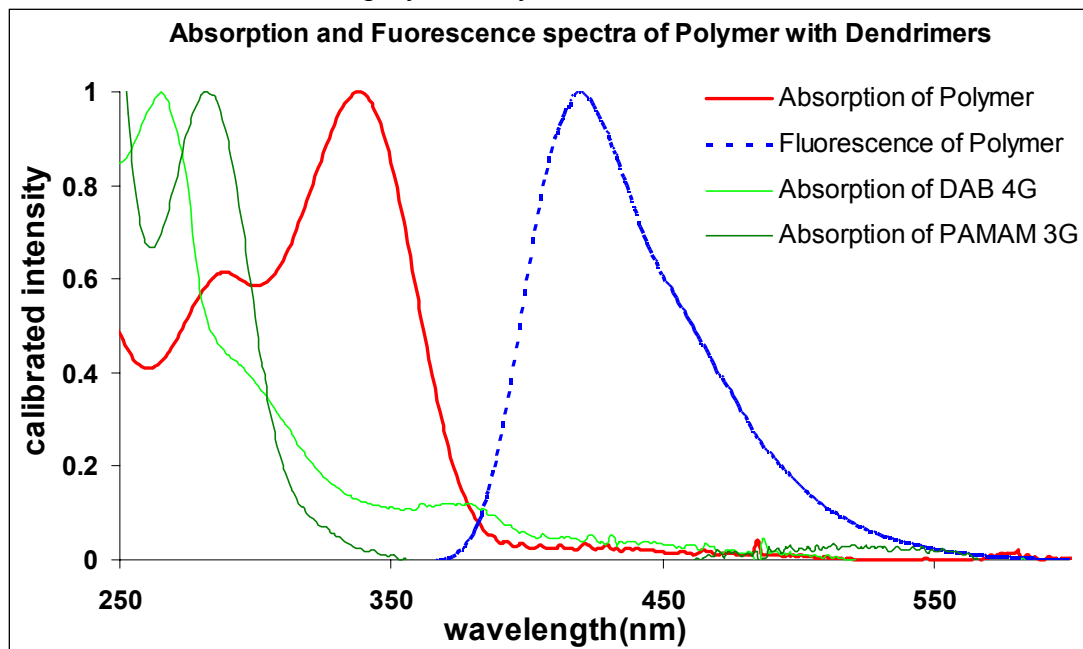

Shown below are CD spectra for the native cytochrome c, denatured cytochrome c, and the apocytochrome c.

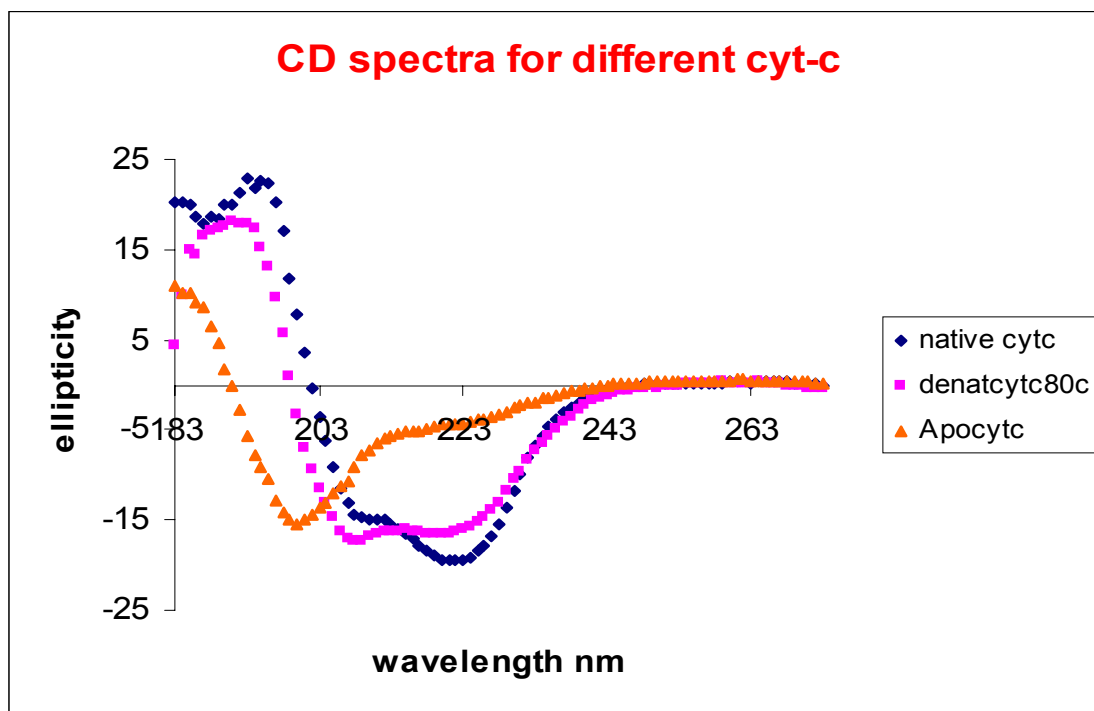

Supplement: Supplementary file 1 [file 5136943]
